1 **Illumina iSeq 100 and MiSeq exhibit similar performance in freshwater fish**

2 **environmental DNA metabarcoding**

3 **Running title:** Fish eDNA metabarcoding using iSeq and MiSeq

4 **Ryohei Nakao<sup>1</sup>, Ryutei Inui<sup>2</sup>, Yoshihisa Akamatsu<sup>1</sup>, Masuji Goto<sup>3</sup>, Hideyuki Doi<sup>4</sup>,**

5 **Shunsuke Matsuoka<sup>4</sup>**

6 <sup>1</sup>Graduate School of Science and Technology for Innovation, Yamaguchi University, 2-16-1,

7 Tokiwadai, Ube, Yamaguchi, 755-8611, Japan.

8 <sup>2</sup>Faculty of Socio-Environmental Studies, Fukuoka Institute of Technology, 3-30-1,

9 Wajiro-higashi, Higashi-Ku, Fukuoka, 811-0295, Japan.

10 <sup>3</sup>Research and Development Center of Nippon Koei Co. Ltd., 2304, Inarihara, Tsukuba,

11 Ibaraki, 300-1259, Japan.

12 <sup>4</sup>Graduate School of Simulation Studies, University of Hyogo, 7-1-28,

13 Minatojima-minamimachi, Chuo-ku, Kobe, 650-0047, Japan.

14 **Correspondence**

15 Ryohei Nakao, Graduate School of Science and Technology for Innovation, Yamaguchi

16 University, 2-16-1, Tokiwadai, Ube, Yamaguchi, 755-8611, Japan.

17 E-mail: [lineck92@yahoo.co.jp](mailto:lineck92@yahoo.co.jp)

18

19 **Abstract**

20 Environmental DNA (eDNA) analysis is a method of detecting DNA from environmental  
21 samples, and it is used as a biomonitoring tool. In recent studies, Illumina MiSeq has been the  
22 most extensively used tool for eDNA metabarcoding, one of the eDNA analysis approaches.  
23 The Illumina iSeq 100 (hereafter, iSeq) is one of the numerous high-throughput sequencers  
24 (HTS). It has a relatively simple workflow and is potentially more affordable than other  
25 sequencers for deployment in HTS environments. However, to date, only a few studies have  
26 adopted iSeq, and its utility in eDNA metabarcoding has still not been investigated  
27 comprehensively. In the present study, we applied fish eDNA metabarcoding to river and lake  
28 environmental samples using iSeq and MiSeq approaches. We also assessed differences in fish  
29 species detectability among iSeq, MiSeq, and conventional approaches. Twenty-seven river  
30 and 13 lake samples were amplified using MiFish primers and sequenced with iSeq and  
31 MiSeq, respectively. The iSeq and MiSeq metabarcoding achieved high detectability for fish  
32 taxa in the ecosystems. Species numbers and compositions in each river detected using iSeq  
33 were almost consistent with those of MiSeq, indicating detectability of both techniques was  
34 comparable. The comparison of the species compositions of the two HTSs with those of  
35 conventional methods showed that the common species between each HTS and the  
36 conventional methods were exactly similar. According to the results, if the same amplicon

37 library were used for sequencing, there would be negligible detectability differences between

38 iSeq and MiSeq based on eDNA metabarcoding.

39 **Keywords:** environmental DNA, metabarcoding, MiFish, iSeq 100, MiSeq

40

41

## 42 **Introduction**

43 Environmental DNA (eDNA) analysis methods can detect the DNA fragments shed from  
44 macro-organisms in environmental samples (water, sediment, or air). The eDNA methods can  
45 provide information on the distribution, abundance, seasonal change, and migration of species  
46 (Takahara et al., 2012; Doi et al., 2017; Stockle et al., 2017; Wu et al., 2019) and can facilitate  
47 biodiversity monitoring activities (Tabarlet et al., 2012; Barns & Turner, 2016). Furthermore,  
48 eDNA methods use environmental samples for DNA detection, permitting non-invasive and  
49 non-destructive surveys in target species, habitats, and ecosystems (Jerde et al., 2011). One of  
50 the eDNA methods, eDNA metabarcoding, can detect multiple species from an environmental  
51 sample simultaneously using high-throughput sequencing (HTS) (Thomsen et al., 2012; Miya  
52 et al., 2015; Yamamoto et al., 2017; Deiner et al., 2017). eDNA metabarcoding has been  
53 applied to detect both vertebrate (Port et al., 2016; Closek et al., 2019; Ushio et al., 2017;  
54 2018, Miya et al., 2015) and invertebrate (Komai et al., 2019; Thomsen & Sigsgaard 2019;  
55 Mychek-Londer et al., 2019) compositions in communities. In addition, eDNA metabarcoding  
56 can detect higher levels of species diversity (Olds et al., 2016; Shaw et al., 2016) or  
57 complementary species diversity compared to conventional monitoring methods (Yamamoto  
58 et al., 2017; Hänfling et al., 2016).

59 Illumina MiSeq is the mainstream HTS platform for the detection species composition

60 using eDNA metabarcoding (Miya et al., 2015; Port et al., 2016; Deiner et al., 2016; Stoeckle  
61 et al., 2017; Komai et al., 2019). In early 2019, the Illumina iSeq 100 (iSeq), which is a  
62 simpler and more affordable HTS system, was released (Illumina, 2019a). The differences  
63 between iSeq and MiSeq are as follows. First, iSeq and MiSeq have different base-calling  
64 systems, with iSeq sequencing in a single-color signal, while MiSeq has four-color signals  
65 corresponding to each sequence (Illumina, 2019a). Secondly, the structure of the flow cell for  
66 loading the sequencing library varies between iSeq and MiSeq, with iSeq being a patterned  
67 flow cell, while MiSeq is a random flow cell. Finally, the sequencing workflow between the  
68 iSeq and MiSeq is different. The iSeq is simpler and requires less preparation using the  
69 cartridge, while the MiSeq requires relatively more preparation steps, including pre- and  
70 post-run wash of the flow channel. Such differences between the two sequencing approaches  
71 could influence species detectability and the sequencing quality during eDNA metabarcoding.  
72 However, to the best of our knowledge, no eDNA studies have been conducted using iSeq,  
73 and no comparative studies between iSeq and MiSeq have been performed.

74 In the present study, we compared the sequence quality and taxonomic assignment of  
75 eDNA metabarcoding between iSeq and MiSeq using the fish-specific primer set (MiFish  
76 primers; Miya et al. 2015). In addition, to evaluate the capacity of iSeq and MiSeq to detect  
77 species based on eDNA metabarcoding, we compared fish species compositions between

78 eDNA metabarcoding (iSeq and MiSeq) and conventional methods.

79

## 80 **Materials and Methods**

### 81 *Sample collection and filtration*

82 We used 40 water samples for eDNA metabarcoding from 27 sites in 9 rivers and 13 lakes  
83 in Japan from 2016 to 2018 (Fig. 1). Sampling ID and detailed information for each site are  
84 listed in Supplementary Table S1. In the river water sampling, 1-L water samples were  
85 collected from the surface of at the shore of each river using bleached plastic bottles. In the  
86 field, a 1-ml Benzalkonium chloride solution (BAC, Osuban S, Nihon Pharmaceutical, Tokyo,  
87 Japan; Yamanaka et al., 2017) was added to each water sample to suppress eDNA  
88 degeneration before filtering the water samples. We did not include field negative control  
89 samples in the HTS library, considering the aim of the presents study. The lake samples were  
90 provided by Doi et al. (2020) as DNA extracted samples. In the lake samples, 1-L water  
91 samples were collected from the surface at shore sites at each lake. The samples were then  
92 transported to the laboratory in a cooler at 4°C. Each of the 1-L water samples was filtered  
93 through GF/F glass fiber filter (normal pore size = 0.7 µm; diameter = 47 mm; GE Healthcare  
94 Japan Corporation, Tokyo, Japan) and divided into two parts (maximum 500-ml water per 1  
95 GF/F filter). To prevent cross-contamination among the water samples, the filter funnels, and

96 the measuring cups were bleached after filtration. All filtered samples were stored at  $-20^{\circ}\text{C}$  in  
97 the freezer until the DNA extraction step.

98

#### 99 *DNA extraction and library preparation*

100 The total eDNA was extracted from each filtered sample using the DNeasy Blood and  
101 Tissue Kit (QIAGEN, Hilden, Germany). Extraction methods were according to Uchii et al.  
102 (2016), with a few modifications. A filtered sample was placed in the upper part of a Salivette  
103 tube and 440  $\mu\text{L}$  of a solution containing 400  $\mu\text{L}$  Buffer AL and 40  $\mu\text{L}$  Proteinase K added.  
104 The tube with the filtered sample was incubated at  $56^{\circ}\text{C}$  for 30 min. Afterward, the tube was  
105 centrifuged at  $5000 \times g$  for 3 min, and the solution at the bottom part of the tube was collected.  
106 To increase eDNA yield, 220- $\mu\text{L}$  Tris-EDTA (TE) buffer was added to the filtered sample and  
107 the sample re-centrifuged at  $5000 \times g$  for 1 min. Subsequently, 400  $\mu\text{L}$  of ethanol was added to  
108 the collected solution, and the mixture was transferred to a spin column. Afterward, the total  
109 eDNA was eluted in 100- $\mu\text{L}$  buffer AE according to the manufacturer's instructions. All  
110 eDNA samples were stored at  $-20^{\circ}\text{C}$  until the library preparation step.

111 In the present study, we used a universal primer set "MiFish" (Miya et al. 2015) for eDNA  
112 metabarcoding. The amplicon library was prepared according to the following protocols. In  
113 the first PCR, the total reaction volume was 12  $\mu\text{L}$ , containing 6.0 $\mu\text{L}$   $2\times$  KOD buffer, 2.4  $\mu\text{L}$

114 dNTPs, 0.2  $\mu$ L KOD FX Neo (TOYOBO, Osaka, Japan), 0.35  $\mu$ L MiFish-U-F (5'-  
115 *ACACTCTTCCCTACACGACGCTCTTCCGATCTNNNNNNGTCGGTAAACTCGTGCCA*  
116 GC -3'), MiFish-U-R (5'-  
117 *GTGACTGGAGTTCAGACGTGTGCTCTTCCGATCTNNNNNNCATAGTGGGGTATCTAAT*  
118 *CCCAGTTTG* -3'), MiFish-E-F (5'-  
119 *ACACTCTTCCCTACACGACGCTCTTCCGATCTNNNNNNRGTTGGTAAATCTCGTGCC*  
120 *AGC* -3') and MiFish-E-R (5'-  
121 *GTGACTGGAGTTCAGACGTGTGCTCTTCCGATCTNNNNNNGCATAGTGGGGTATCTAA*  
122 *TCCTAGTTTG* -3') primers with Illumina sequencing primer region and 6-mer Ns, and 2  $\mu$ L  
123 template DNA. The thermocycling conditions were 94 $^{\circ}$ C for 2 min, 35 cycles of 98 $^{\circ}$ C for 10 s,  
124 65 $^{\circ}$ C for 30 s, 68 $^{\circ}$ C for 30 s, and 68 $^{\circ}$ C for 5 min. The first PCR was repeated four times for  
125 each sample, and the replicated samples were pooled as a single first PCR product for use in  
126 the subsequent step. The pooled first PCR products were purified using the Solid Phase  
127 Reversible Immobilization select Kit (AMPure XP; BECKMAN COULTER Life Sciences,  
128 Indianapolis, IN, USA) according to the manufacturer's instructions. The DNA concentrations  
129 of purified first PCR products were measured using a Qubit dsDNA HS assay kit and a Qubit  
130 3.0 fluorometer (Thermo Fisher Scientific, Waltham, MA, USA). All purified first PCR  
131 products were diluted to 0.1 ng/ $\mu$ L with H<sub>2</sub>O, and the diluted samples were used as templates



132 for the second PCR. In the first PCR step, the PCR negative controls (four replicates) were  
133 included in each experiment. A total of three PCR negative controls were included in the  
134 library (PCR Blank 1–3 samples in Supplementary Table S1, S2, S4, and S5).

135 The second PCR was performed to add HTS adapter sequences with 8-bp dual indices. The  
136 total reaction volume was 12  $\mu\text{L}$ , containing 6.0  $\mu\text{L}$  2 $\times$  KAPA HiFi HotStart ReadyMix, 1.4  
137  $\mu\text{L}$  forward and reverse primer (2.5  $\mu\text{M}$ ), 1  $\mu\text{L}$  purified first PCR product, and 2.2  $\mu\text{L}$   $\text{H}_2\text{O}$ .  
138 The thermocycling conditions were 95 $^\circ$  for 3 min, 12 cycles of 98 $^\circ$  for 20 s, 72 $^\circ$  for 15 s,  
139 and 72 $^\circ$  for 5 min.

140 Each Indexed second PCR product was pooled in the equivalent volume, and 25  $\mu\text{L}$  of the  
141 pooled libraries were loaded on a 2% E-Gel SizeSelect agarose gels (Thermo Fisher  
142 Scientific), and a target library size (ca. 370 bp) was collected. The quality of the amplicon  
143 library was checked using an Agilent 2100 Bioanalyzer and Agilent 2100 Expert (Agilent  
144 Technologies Inc., Santa Clara, CA, USA), and the DNA concentrations of the amplicon  
145 library were measured using Qubit dsDNA HS assay Kit using a Qubit 3.0 fluorometer.

146

#### 147 *High-throughput sequencing*

148 Amplicon library was sequenced using iSeq and MiSeq platforms (Illumina, San Diego,  
149 CA, USA). To normalize the percentage of pass-filtered read numbers, the sequencing runs

150 using the same libraries were performed using iSeq i1 Reagent and MiSeq Reagent Kit v2  
151 Micro. Both sequencing was performed with 8 million pair-end reads and 2×150 bp read  
152 lengths. Each library was spiked with approximately 20% PhiX control (PhiX Control Kit v3,  
153 Illumina, San Diego, CA, USA) before sequencing runs according to the recommendation of  
154 Illumina. The wells of cartridges in the iSeq run were loaded with 20 µL of 50 pM library  
155 pool, and sequencing performed at Yamaguchi University, Yamaguchi, Japan. The wells of  
156 cartridges for MiSeq runs were loaded with 600 µL of 16 pM library pool, and sequencing  
157 performed at Illumina laboratories (Minato-ku, Tokyo, Japan). Subsequently, the sequencing  
158 dataset outputs from iSeq and MiSeq were subjected to pre-processing and taxonomic  
159 assignments. All sequence data are registered in the DNA Data Bank of Japan (DDBJ)  
160 Sequence Read Archive (DRA, Accession number: DRA10593).

161

### 162 *Pre-processing and taxonomic assignments*

163 We used the USEARCH v11.0667 (Edger, 2010) for all data pre-processing activities and  
164 taxonomic assignment of the HTS datasets obtained from the iSeq and MiSeq platforms  
165 (Komai et al., 2019; Takeuchi et al., 2019). First, pair-end reads (R1 and R2 reads) generated  
166 from iSeq and MiSeq platforms were assembled using the “fastq\_mergepairs” command  
167 (overlapped reads are not written). In the process, the low-quality tail reads with a cut-off

168 threshold at a Phred score of 2, and the paired reads with too many mismatches (> 5 positions)  
169 in the aligned regions were discarded. Secondly, the primer sequences were removed from the  
170 merged reads using the “fastx\_truncate” command. Afterward, read quality filtering was  
171 performed using the “fastq\_filter” command with thresholds of max expected error > 1.0 and  
172 > 50 bp read length. The pre-processed reads were dereplicated using the “fastx\_uniques”  
173 command, and the chimeric reads and less than 10 reads were removed from all samples as  
174 the potential sequence errors. Finally, an error-correction of amplicon reads, which checks and  
175 discards the PCR errors and chimeric reads, was performed using the “unoise3” command in  
176 the unoise3 algorithm (Edger & Flyvbjerg, 2016). Before the taxonomic assignment, the  
177 processed reads from the above steps were subjected to sequence similarity search using the  
178 “usearch\_global” command against reference databases of fish species that had been  
179 established previously (MiFish local database v34). The sequence similarity and cut off  
180 E-value were 99% and  $10^{-5}$ , respectively. If there was only one species with  $\geq 99$  % similarity,  
181 the sequence was assigned to the top-hit species. Conversely, sequences assigned to two or  
182 more species in the  $\geq 99$  % similarity were merged as species complex and listed in the  
183 synonym group. Generally, the species complexes were assigned to the genus level (e.g. Asian  
184 crucian carp *Carassius* spp.). Species that were unlikely to inhabit Japan were excluded from  
185 the candidate list of species complexes. For example, the sequence of one of bitterling

186 *Acheilognathus macropterus* included other different two species, *Acheilognathus barbatus*  
187 and *Acheilognathus chankaensis*, as the species of the 2nd hit candidate; however, the two  
188 species are not currently found in Japan. Therefore, the sequence was assigned to *A.*  
189 *macropterus* in the present study. Because we used only freshwater fish species, we removed  
190 the OTUs assigned to marine and brackish fishes from each sample. Finally, sequence reads  
191 of each fish species were arranged into the matrix, with the rows and columns representing  
192 the number of sites and fish species (or genus), respectively.

193

#### 194 *Comparing sequence quality and fish fauna between iSeq and MiSeq*

195 We evaluated sequence quality based on 1) the percentage of clustering passing filter (%  
196 PF) and 2) sequencing quality score  $\geq$  % Q30 (Read1 and Read2) between iSeq and MiSeq  
197 platforms. The % PF value is an indicator of signal purity for each cluster. When an HTS  
198 library with higher DNA concentrations is loaded, flow cells typically have high numbers of  
199 overlapped clusters and are over clustered. The condition leads to poor template generation,  
200 which decreases the % PF value (Illumina, 2019b). In the present study, a >80 % PF value  
201 was set as the threshold of sequence quality in iSeq and MiSeq runs. Sequence quality scores  
202 (Q score) measure the probability that a base is called incorrectly. With sequencing by  
203 synthesis (SBS) technology, each base in a read is assigned a quality score by a Phred-like

204 algorithm, similar to that originally developed for Sanger sequencing experiments (Ewing et  
205 al. 1998). Higher Q scores indicate lower probability of sequencing error, and lower Q scores  
206 indicate probability of false-positive variant calls resulting in inaccurate conclusions. In the  
207 present study, the % Q30 values (error rate = 0.001 %) were used for the comparison of  
208 sequence quality between iSeq and MiSeq. The parameters were collected directly using  
209 Illumina BaseSpace Sequence Hub.

210 We also evaluated changes in sequence reads in pre-processing steps between iSeq and  
211 MiSeq platforms. Sequence reads were assessed based 1) merge pairs, 2) quality filtering, and  
212 3) denoising. Sequence R1 and R2 reads generated from HTS were first merged into single  
213 sequence reads using the “fastq\_mergepairs” command; however, non-merged sequence reads  
214 were discarded in this step. In the merge pairs step, the changes in sequence reads from raw  
215 sequence reads to merged sequence reads were calculated. In the quality filtering step, the  
216 changes in sequence reads from merged sequence reads to sequence reads through the quality  
217 filtering step were calculated. Finally, in denoising steps, the changes in sequence reads from  
218 sequence reads through the quality filtering step to sequence reads through the denoising step  
219 were calculated. The calculated numbers of sequence reads are listed in Supplementary Table  
220 S2 and S3 in series.

221 Before the comparison of fish fauna, rarefaction curves were illustrated for each sample in

222 both iSeq and MiSeq to confirm that the sequencing depth adequately covered the species  
223 composition using the “rrarefy” function of the “vegan” package ver. 2.5-6  
224 (<https://github.com/vegandevs/vegan>) in R ver. 3.6.2 (R Core Team 2019). We evaluated the  
225 species detection capacities of iSeq and MiSeq based on environmental DNA metabarcoding  
226 by comparing the differences in species composition and the number of species detected  
227 between the two sequencers. To test the differences in the number of species between iSeq  
228 and MiSeq, we performed paired t-tests based on the number of species at each sampling site.  
229

230 *Comparison of fish species detectability between eDNA metabarcoding and conventional*  
231 *methods*

232 We evaluated species detectability between HTS platforms by comparing the fish species  
233 lists of HTS platforms with lists from conventional methods. Five sampling sites were  
234 selected from Kyushu and Chugoku districts (R23–27 in Fig.1). The fish fauna data obtained  
235 by conventional methods were based on the results of a previous study (Doi et al., 2020). The  
236 conventional surveys were conducted through hand-net sampling and visual observation by  
237 snorkeling (see Doi et al., 2020 for the detailed methods). The count data of each species were  
238 replaced with the incidence-based datasets (presence or absence) for comparing with the  
239 eDNA metabarcoding datasets. Fish sequence reads of each sampling site obtained by eDNA

240 metabarcoding were also replaced with the incidence-based data.

241 To test the detectability of species observed with detectability under conventional methods,  
242 the fish species compositions in five rivers were compared between the eDNA metabarcoding  
243 (iSeq and MiSeq) and the conventional methods. Using fish faunal data obtained from iSeq,  
244 MiSeq, and conventional methods, non-metric multidimensional scaling (NMDS) was  
245 performed in 1000 separate runs. For NMDS, the dissimilarity of the fish fauna was  
246 calculated based on the incidence-based Jaccard indices. Permutational multivariate analysis  
247 of variance (PERMANOVA) was performed with 1000 permutations to assess the differences  
248 in fish fauna among the methods and sites. Furthermore, to evaluate variance across sites  
249 among methods, the permutational analyses of multivariate dispersions (PERMDISP) was  
250 also performed with 1000 permutations. The “metaMDS”, “adonis”, and “betadisper”  
251 functions in the “vegan” package ver. 2.5-6 were used for NMDS ordination, PERMNOVA,  
252 and PERMDISP, respectively. To visualize the number of species in each method and the  
253 number of common species between methods, Venn diagrams were illustrated for each river  
254 using the “VennDiagram” package ver. 1.6.2 (Chen & Boutros, 2011) in R. To assess  
255 differences in the number of species among methods at each river, the repeated measures  
256 analysis of variance (ANOVA) was performed among iSeq, MiSeq, and conventional methods.  
257 If a significant difference was found in repeated measures ANOVA, the Tukey-Kramer

258 multiple comparison test was performed to analyze differences among methods.

259

## 260 **Results**

### 261 *HTS using iSeq and MiSeq*

262 In iSeq, the passing Filter (% PF),  $\geq$  % Q30 (Read 1), and  $\geq$  % Q30 (Read 2) were 80.80,  
263 96.80, and 95.30%, respectively (Fig S1). In MiSeq, Passing Filter (% PF),  $\geq$  % Q30 (Read 1),  
264 and  $\geq$  % Q30 (Read 2) were 95.05, 97.30, and 96.48%, respectively (Fig. S1). The % PF  
265 value of iSeq was slightly lower than that of MiSeq; however, this was due to differences in  
266 the %PF calculation methods (Illumina, 2017). The Q30 values of Read 1 and 2 were not  
267 remarkably different between iSeq and MiSeq.

268 In total, 3,325,177 and 2,154,367 read sequences were determined using iSeq and MiSeq,  
269 respectively. The sequencing depth and sequence per sample were consistent between iSeq  
270 and MiSeq in each processing step (Supplementary Table 2 and 3, Fig. S2–S5). In the present  
271 study, the differences in the numbers of sequence reads among samples were confirmed in the  
272 two sequencers. The rarefaction curves were saturated in all iSeq and MiSeq samples  
273 (Supplementary Fig. S6 and S7). Therefore, the rarefying of read numbers among the samples  
274 was not performed.

275



276 *Taxonomic assignment of sequence read*

277 Sequence reads obtained from iSeq and MiSeq in the river and lake samples after  
278 pretreatment are listed in Table 1. After the denoising step, most sequence reads in iSeq and  
279 MiSeq could be taxonomically assigned to fish species. In total, 154 and 168 representative  
280 iSeq and MiSeq sequences, respectively, were assigned to fish species (Assigned Reads in  
281 Table 1). After the taxonomic assignment, 102 and 101 freshwater fish sequences with  $\geq$   
282 99 % identity were retained in iSeq and MiSeq, respectively. Low numbers of sequence reads  
283 of two species (*Rhinogobius* sp. and *Tridentiger* sp.) were retained from negative control  
284 samples (NC41–43) of iSeq and MiSeq (Supplementary Table S4 and S5), which could be due  
285 to cross-contamination among samples. The species were commonly observed throughout the  
286 samples, and the source of contamination could not be identified. Therefore, we did not assess  
287 cross-contamination across the samples using negative control samples.

288 Based on the sequencing results, retained iSeq and MiSeq sequences were assigned to 69  
289 and 68 freshwater fish species, subspecies, or genera, respectively (Supplementary Table S4  
290 and S5). The genera that were assigned to multiple candidate species are listed in  
291 Supplementary Table S6. Species compositions in all samples were almost similar between  
292 iSeq and MiSeq. However, Japanese striped loach *Cobitis biwae* typeB was only detected in  
293 L11 by iSeq sequencing. The number of species per sample ranged from 4 to 27, in iSeq, and

294 4 to 26, in MiSeq. The paired  $t$ -test revealed significant differences in the number of species  
295 between iSeq and MiSeq at all sites ( $t = 5.6488$ ,  $p < 0.001$ ). The differences in the number of  
296 species between iSeq and MiSeq ranged from 0 to 4. However, species that were detected by  
297 iSeq only often had low read counts (11 to 32 reads per species, Supplementary Table S). For  
298 example, 15 and 12 species were detected in the iSeq and MiSeq at site 5; however, the  
299 numbers of reads of the three species detected only in the iSeq were 11 (*Lepomis*  
300 *macrochirus*), 11 (*Oncorhynchus masou* subsp.), and 28 (*Tachysurus nudiceps*), respectively  
301 (Supplementary Table S7).

302

### 303 *Comparison of fish species composition between eDNA methods and conventional methods*

304 R23–27 river samples were used for the comparisons between the two sequencers and the  
305 conventional methods (Fig. 2). A total of 30, 30, and 29 species were detected in R23–27  
306 using the iSeq, MiSeq, and conventional methods, respectively (Supplementary Table S8).  
307 The number of species detected by iSeq, MiSeq, and conventional methods were 14–19, 14–  
308 –19, and 8–16 in each site in R23–27, respectively (Supplementary Table S8). The number of  
309 species detected by iSeq and MiSeq was higher than that detected the conventional methods  
310 in all survey sites (deep green in Fig. 2). High numbers of species were commonly detected  
311 by iSeq, MiSeq, and conventional methods. In addition, no species that was common between

312 iSeq or MiSeq and conventional methods was identified. Based on the results of repeated  
313 measured ANOVA, there were significant differences among methods ( $F = 9.061$ ,  $p = 0.0088$ ),  
314 among sites ( $F = 4.827$ ,  $p = 0.0282$  in Supplementary Table S9). However, based on the  
315 results of the subsequent Tukey-Kramer test, there were no significant differences among the  
316 three methods ( $p > 0.05$ , Supplementary Table S10).

317 To assess differences in species composition among the three methods, we used NMDS  
318 ordination (Fig. 3). In NMDS ordination, the fish communities of iSeq and MiSeq at each site  
319 were plotted at almost similar coordinates. Based on the results of PERMANOVA and  
320 PERMDISP analyses, there were no significant differences in species composition evaluated  
321 by iSeq, MiSeq, and conventional methods (PERMANOVA,  $p = 0.48450$  and PERMDISP,  $p$   
322  $= 0.18510$  in Table 2). Therefore, there were no significant differences in assemblage structure  
323 among the three methods.

324

## 325 **Discussion**

326 Here, we observed that iSeq and MiSeq could obtain similar sequence qualities and fish  
327 fauna in eDNA metabarcoding. As mentioned previously, the SBS chemistry of iSeq is  
328 distinct from that of MiSeq in sequencing workflow and base-calling, as well as distinct  
329 cartridge structures and flow cell mechanisms. However, such differences would not influence

330 sequence quality in eDNA metabarcoding activities. In addition, we obtained high-quality  
331 sequence data and a few sequencing errors were observed in both iSeq and MiSeq.  
332 Furthermore, the rate of change in the number of sequence reads in each process of the  
333 analytical pipeline was almost similar between iSeq and MiSeq.

334 The freshwater fish fauna in the rivers and lakes identified by MiFish metabarcoding  
335 exhibited minimal differences in the number of species or species composition between iSeq  
336 and MiSeq. Generally, the number of species per sample in iSeq was higher than that in  
337 MiSeq due to the differences in the obtained sequence reads between the two sequencers.  
338 Species detected only in the iSeq had relatively low numbers of reads (11–32 reads,  
339 Supplementary Table S10). Since the same sequence library was used in the iSeq and MiSeq,  
340 the reads of such species could have been detected in the MiSeq by increasing the sequencing  
341 depth. Such results indicate that the number of species that can be detected by iSeq and  
342 MiSeq are approximately similar if the same sequence library is used.

343 Based on the results of the comparisons of the numbers of species among the three methods,  
344 the number of species detected by eDNA metabarcoding was higher than those of  
345 conventional methods in each river, including many species that were only detected by HTS  
346 (Fig. 2). Conversely, some species were only observed in each river using the conventional  
347 methods. In previous studies, eDNA metabarcoding has exhibited "higher diversity" or

348 "complementary" results when compared to the results of conventional methods (Olds et al.  
349 2016, Yamamoto et al. 2017, Deiner et al. 2017). Such complementary results in iSeq and  
350 MiSeq support the findings of previous studies. Nevertheless, there were no statistically  
351 significant differences in the numbers of observed species among the three methods.

352 Studies of eDNA metabarcoding have been increasing annually, and it is attracting the  
353 attention of researchers and stakeholders as a time- and cost-efficient method for detecting  
354 species composition and diversity (Tsuji et al. 2019). Traditionally, MiSeq has been used  
355 extensively for eDNA metabarcoding (Miya et al. 2015, Port et al. 2016, Deiner et al. 2016,  
356 Stoeckle et al. 2017, Komai et al. 2019). Our results indicate that iSeq can be used for eDNA  
357 metabarcoding and has similar levels of species detectability to MiSeq. Despite the  
358 differences in sequencing depths, iSeq and MiSeq revealed similar fish fauna at each site. The  
359 results suggest that fish fauna from iSeq and MiSeq can be compared directly if library  
360 preparation is performed using similar processes. MiSeq has an advantage over iSeq because  
361 it can be used for a wide range of taxa and purposes due to the availability of different kits  
362 with different lead lengths (max.  $2 \times 300$  bp) and the number of leads (max. pair-end 25  
363 million leads). However, MiSeq has to be adhere to a few complex procedures during  
364 sequencing, such as the need to clean the channels for decontamination between sequencing  
365 runs. Such procedural complexity may lead to cross-contamination between library samples

366 or between sequencing runs. In contrast, the iSeq has less working procedures than MiSeq  
367 because of the use of cartridges and no need to clean the flow path. Therefore, iSeq may have  
368 lower cross-contamination risk between sequencing runs than MiSeq. Future research should  
369 evaluate cross-contamination risk between the two technologies.

370

### 371 **Acknowledgments**

372 We thank T. Kono and K. Yamaguchi for assisting in the field sampling. We also thank H.  
373 Fujii for assistance in the laboratory work and S. Miyazono for providing constructive  
374 comments on an earlier version of the manuscript. We thank K. Naka for assisting in iSeq  
375 running, and T. Kobayashi for running the MiSeq platform at the Illumina laboratory and for  
376 manuscript corrections. We also thank Illumina K. K. (Japan) for providing us with a  
377 sequencing cartridge kit for the iSeq run.

378

### 379 **References**

- 380 Barnes, M.A. & Turner, C. R. (2016). The ecology of environmental DNA and implications  
381 for conservation genetics. *Conservation Genetics*, 17, 1–17.  
382 <https://doi.org/10.1007/s10592-015-0775-4>  
383
- 384 Barnes, M. A., Turner, C. R., Jerde, C. L., Renshaw, M. A., Chadderton, W. L., & Lodge, D.  
385 M. (2014). Environmental conditions influence eDNA persistence in aquatic systems.  
386 *Environmental Science & Technology*, 48, 1819–1827.  
387 <https://doi.org/10.1021/es404734p>  
388
- 389 Bylemans, J., Furlan, E. M., Hardy, C. M., McGuffie, P., Lintermans, M., & Gleeson, D. M.

- 390 (2017). An environmental DNA-based method for monitoring spawning activity: a  
391 case study, using the endangered Macquarie perch (*Macquaria australasica*). *Methods*  
392 *in Ecology and Evolution*, 8, 646–655. <https://doi.org/10.1111/2041-210X.12709>  
393
- 394 Chen, H., & Boutros, P.C. (2011). Venn Diagram: a package for the generation of  
395 highly-customizable Venn & Euler diagrams in R. *BMC Bioinformatics*, 12, 35.  
396 <https://doi.org/10.1186/1471-2105-12-35>  
397
- 398 Closek, C. J., Santora, J. A., Starks, H. A., Schroeder, I. D., Andruszkiewicz, E. A., Sakuma,  
399 K. M., Bograd, S. J., Hazen, E. L., Field, J. C., & Boehm, A. B. (2019). Marine  
400 vertebrate biodiversity and distribution within the Central California Current using  
401 environmental DNA (eDNA) Metabarcoding and Ecosystem Surveys. *Frontiers in*  
402 *Marine Science*, 16. <https://doi.org/10.3389/fmars.2019.00732>  
403
- 404 Deiner, K., Bik, H.M., Mächler, E., Seymour, M., Lacoursière-Roussel, A., Altermatt, F., Creer,  
405 S., Bista, I., Lodge, D.M., Vere, N., Pfrender, M.E., & Bernatchez, L. (2017).  
406 Environmental DNA metabarcoding: Transforming how we survey animal and plant  
407 communities. *Molecular Ecology*, 26(21), 5872–5895.  
408 <https://doi.org/10.1111/mec.14350>  
409
- 410 Doi, H., Inui R., Akamatsu, Y., Kannno, K., Yamanaka, H., Takahara, T., & Minamoto, T.  
411 (2017). Environmental DNA analysis for estimating the abundance and biomass of stream  
412 fish. *Freshwater Biology*, 62: 30–39. <https://doi.org/10.1111/fwb.12846>  
413
- 414 Doi, H., Inui R., Matsuoka S., Akamatsu Y., Goto M., & Kono T. (2020). Evaluation of  
415 biodiversity metrics through environmental DNA metabarcoding compared with visual  
416 and capture surveys in river fish community. *BioRxiv* preprint,  
417 <https://doi.org/10.1101/617670>.  
418
- 419 Doi, H., Matsuoka S., Matsuzaki S. S., Nagano M., Sato H., Yamanaka H., Matsuhashi S.,  
420 Yamamoto S., Minamoto T., Araki H., Ikeda K., Kato A., Kumei K., Maki M.,  
421 Mitsuzuka T., Takahara T., Toki K., Ueda N., Watanabe T., Yamazoe K., & Miya M.  
422 The effects of ecosystem characteristics and species traits on species detection by  
423 eDNA metabarcoding compared to species records in Japanese lake fish communities.  
424 *Molecular Ecology*, submitted.  
425
- 426 Edgar, R. C. (2010). Search and clustering orders of magnitude faster than BLAST.

- 427 *Bioinformatics*, 26, 2460–2461. <https://doi.org/10.1093/bioinformatics/btq461>  
428
- 429 Edgar, R. C. and Flyvbjerg, H. (2015). Error filtering, pair assembly and error correction for  
430 next-generation sequencing reads. *Bioinformatics*, 31, 3476–3482.  
431 <https://doi.org/10.1093/bioinformatics/btv401>  
432
- 433 Ewing, B., Hillier L., Wendl M. C., & Green P. (1998). Base-calling of automated sequencer  
434 traces using Phred. I. Accuracy assessment. *Genome Research*, 8: 175–185.  
435 <https://doi.org/10.1101/gr.8.3.175>  
436
- 437 Hänfling, B., Handley, L. L., Read, D. S., Hahn, C., Li, J., Nichols, P., Blackman, R. C.,  
438 Oliver, A., & Winfield, I. J. (2016). Environmental DNA metabarcoding of lake fish  
439 communities reflects long-term data from established survey methods. *Molecular*  
440 *Ecology*, 25, 3101–3119. <https://doi.org/10.1111/mec.13660>  
441
- 442 Hinlo, R., Furlan, E., Sutor, L., & Gleeson D. (2017). Environmental DNA monitoring and  
443 management of invasive fish: comparison of eDNA and fyke netting. *Management of*  
444 *Biological Invasions*, 8: 89–100. <https://doi.org/10.3391/mbi.2017.8.1.09>  
445
- 446 Illumina. (2017). *Calculating percent passing filter for patterned and nonpatterned flow*  
447 *cells-A comparison of methods for calculating percent passing filter on Illumina flow*  
448 *cells* Illumina.  
449 [https://www.illumina.com/content/dam/illumina-marketing/documents/products/](https://www.illumina.com/content/dam/illumina-marketing/documents/products/technotes/hiseq-x-percent-pf-technical-note-770-2014-043.pdf)  
450 [technotes/hiseq-x-percent-pf-technical-note-770-2014-043.pdf](https://www.illumina.com/content/dam/illumina-marketing/documents/products/technotes/hiseq-x-percent-pf-technical-note-770-2014-043.pdf)  
451
- 452 Illumina. (2019a). *iSeq 100 sequencing system guide*. Illumina. [https://support.](https://support.illumina.com/downloads/iseq-100-system-guide-1000000036024.html)  
453 [illumina.com/downloads/iseq-100-system-guide-1000000036024.html](https://support.illumina.com/downloads/iseq-100-system-guide-1000000036024.html)  
454
- 455 Illumina. (2019b). *Cluster optimization overview guide*. Illumina. [https://support.](https://support.illumina.com/downloads/cluster-optimization-overview-guide-1000000071511.html)  
456 [illumina.com/downloads/cluster-optimization-overview-guide-1000000071511.html](https://support.illumina.com/downloads/cluster-optimization-overview-guide-1000000071511.html)  
457
- 458 Jerde, C. L., Mahon, A. R., Chadderton, W. L., & Lodge, D. M. (2011). “Sight - unseen”  
459 detection of rare aquatic species using environmental DNA. *Conservation Letters*, 4,  
460 150–157. <https://doi.org/10.1111/j.1755-263X.2010.00158.x>  
461
- 462 Komai, T., Goto, O. R., Sado, T., & Miya M. (2019). Development a new set of PCR primers  
463 for eDNA metabarcoding decapod crustaceans, *Metabarcoding & Metagenomics*, 3,



- 464 1–19. <https://doi.org/10.3897/mbmg.3.33835>
- 465
- 466 Miya, M., Sato, Y., Fukunaga, T., Sado, T., Poulsen, J. Y., Sato K., Minamoto, T., Yamamoto,  
467 S., Yamanaka, H., Araki, H., Kondoh, M., & Iwasaki W. (2015). MiFish, a set of  
468 universal PCR primers for metabarcoding environmental DNA from fishes: detection  
469 of more than 230 subtropical marine species. *Royal Society Open Science*, 2, 150088.  
470 <http://dx.doi.org/10.1098/rsos.150088>
- 471
- 472 Mychek-Londer, J. G., Balasingham, K. D., & Heath, D. D. (2019). Using environmental  
473 DNA metabarcoding to map invasive and native invertebrates in two Great Lakes  
474 tributaries. *Environmental DNA*. <https://doi.org/10.1002/edn3.56>
- 475
- 476 Olds, B. P., Jerde, C. L., Renshaw, M. A., Li, Y., Evans, N. T., Turner, C. R., Deiner, K.,  
477 Mahon, A. R., Bruesekel, M. A., Shirey, P. D., Pfrender, M. E., Lodge, D. M., & Lamberti,  
478 G. A. (2016). Estimating species richness using environmental DNA. *Ecology and*  
479 *Evolution*, 6(12), 4214–4226. <https://doi.org/10.1002/ece3.2186>
- 480
- 481 Port, J. A., O'Donnell, J. L., Romero-Maraccini, O. C., Leary P. R., Litvin, S. Y., Nickols, K. J.  
482 Yamahara, K. M. and Kelly R. P. (2016). Assessing vertebrate biodiversity in a kelp forest  
483 ecosystem using environmental DNA. *Molecular Ecology*, 25, 527–541.  
484 <https://doi.org/10.1111/mec.13481>
- 485
- 486 Shaw, J. L.A., Clarke, L. J., Wedderburn, S. D., Barnes, T. C., Weyrich, L. S., & Cooper, A.  
487 (2016). Comparison of environmental DNA metabarcoding and conventional fish survey  
488 methods in a river system. *Biological Conservation*, 197, 131–138.  
489 <https://doi.org/10.1016/j.biocon.2016.03.010>
- 490
- 491 Stoeckle, M. Y., Soboleva L., & Charlop-Powers Z. (2017). Aquatic environmental DNA  
492 detects seasonal fish abundance and habitat preference in an urban estuary. *PLoS ONE*  
493 12(4): e0175186. <https://doi.org/10.1371/journal.pone.0175186>
- 494
- 495 Tabarlet, P., Coissac, E., Hajibabei, M., & Rieseberg, L. H. (2012). Environmental DNA.  
496 *Molecular Ecology*, 21, 1789–1793. <https://doi.org/10.1111/j.1365-294X.2012.05542.x>
- 497
- 498 Takahara, T., Minamoto, T., Yamanaka, H., Doi, H., & Kawabata Z. (2012). Estimation of fish  
499 biomass using Environmental DNA. *PLoS ONE*, 7(4), e35868.  
500 <https://doi.org/10.1371/journal.pone.0035868>

501

502 Takeuchi, A., Sado, T., Gotoh, R.O., Watanabe, S., Tsukamoto, K., & Miya M. (2019). New  
503 PCR primers for metabarcoding environmental DNA from freshwater eels, genus *Anguilla*.  
504 *Scientific Reports*, 9, 7977. <https://doi.org/10.1038/s41598-019-44402-0>

505

506 Thomsen P. F., Kielgast, K., Iversen, L. L., Møller, P. R., Rasmussen, M., & Willerslev, E.  
507 (2012). Detection of a diverse marine fish fauna using Environmental DNA from seawater  
508 samples. *PLoS ONE*, 7(8), e41732. <https://doi.org/10.1371/journal.pone.0041732>

509

510 Thomsen, P. F., & Sigsgaard, E. E. (2019). Environmental DNA metabarcoding of wild  
511 flowers reveals diverse communities of terrestrial arthropods. *Ecological Evolution*, 9,  
512 1665–1679. <https://doi.org/10.1002/ece3.4809>

513

514 Tsuji, S., Takahara, T., Doi, H., Shibata, N., & Yamanaka, H. (2019). The detection of aquatic  
515 macroorganisms using environmental DNA analysis—A review of methods for collection,  
516 extraction, and detection. *Environmental DNA*, 1, 99–108. <https://doi.org/10.1002/edn3.21>

517

518 Uchii, K., Doi, H., & Minamoto, T. (2016). A novel environmental DNA approach to quantify  
519 the cryptic invasion of non-native genotypes. *Molecular Ecology Resources*, 16, 415–422.  
520 <https://doi.org/10.1111/1755-0998.12460>

521

522 Ushio, M., Fukuda, H., Inoue, T., Kobayashi, M., Kishida, O., Sato, K., Murata, K., Nikaido,  
523 M., Sado, T., Sato, Y., Takeshita, M., Iwasaki, W., Yamanaka, H., Kondoh, M., & Miya, M.  
524 (2017). Environmental DNA enables detection of terrestrial mammals from forest pond  
525 water. *Molecular Ecology Resources*, 17, e63–e75.  
526 <https://doi.org/10.1111/1755-0998.12690>

527

528 Ushio, M., Murata, K., Sado, T., Nishiumi, I., Takeshita, M., Iwasaki, W., & Miya M. (2018).  
529 Demonstration of the potential of environmental DNA as a tool for the detection of avian  
530 species. *Scientific Reports*, 8, 4493. <https://doi.org/10.1038/s41598-018-22817-5>

531

532 Yamamoto, S., Masuda, M., Sato, Y., Sado, T., Araki, H., Kondoh, M., Minamoto, T. and  
533 Miya, M. (2017). Environmental DNA metabarcoding reveals local fish communities in a  
534 species-rich coastal sea. *Scientific Reports*, 7, 40368. <https://doi.org/10.1038/srep40368>

535

536 Yamanaka, H., Minamoto, T., Matsuura, J., Sakurai, S., Tsuji, S., Motozawa, H., Hongo, M.,  
537 Sogo, Y., Kakimi, N., Teramura, I., Sugita, M., Baba, M., & Kondo, A. (2017). A simple

538 method for preserving environmental DNA in water samples at ambient temperature by  
539 addition of cationic surfactant. *Limnology*, 18, 233–241.  
540 <https://doi.org/10.1007/s10201-016-0508-5>

541

542 Wu, Q., Kawano, K., Ishikawa, T., Sakata, M. K., Nakao, R., Hiraiwa, M. K. Tsuji, S.,  
543 Yamanaka, H., & Minamoto T. (2019). Habitat selection and migration of the common  
544 shrimp, *Palaemon paucidens* in Lake Biwa, Japan—An eDNA-based study.  
545 *Environmental DNA*, 1, 54–63. <https://doi.org/10.1002/edn3.6>

546

#### 547 **Data Accessibility**

548 All data of the iSeq and MiSeq sequencing was shared in DRA (Accession number:  
549 DRA10593), and all used data, including all detected species by iSeq, MiSeq, and  
550 conventional methods, were shared in Supplemental Tables.

551

#### 552 **Author Contributions**

553 Study Concept: Yoshihisa Akamatsu, Hideyuki Doi

554 Field Sampling: Ryutei Inui, Masuji Goto

555 Data Cleaning: Masuji Goto, Shunsuke Matsuoka, Hideyuki Doi

556 Data Analysis: Ryohei Nakao

557 Manuscript writing and Visualization: Ryohei Nakao

558

559

560

561

562

563

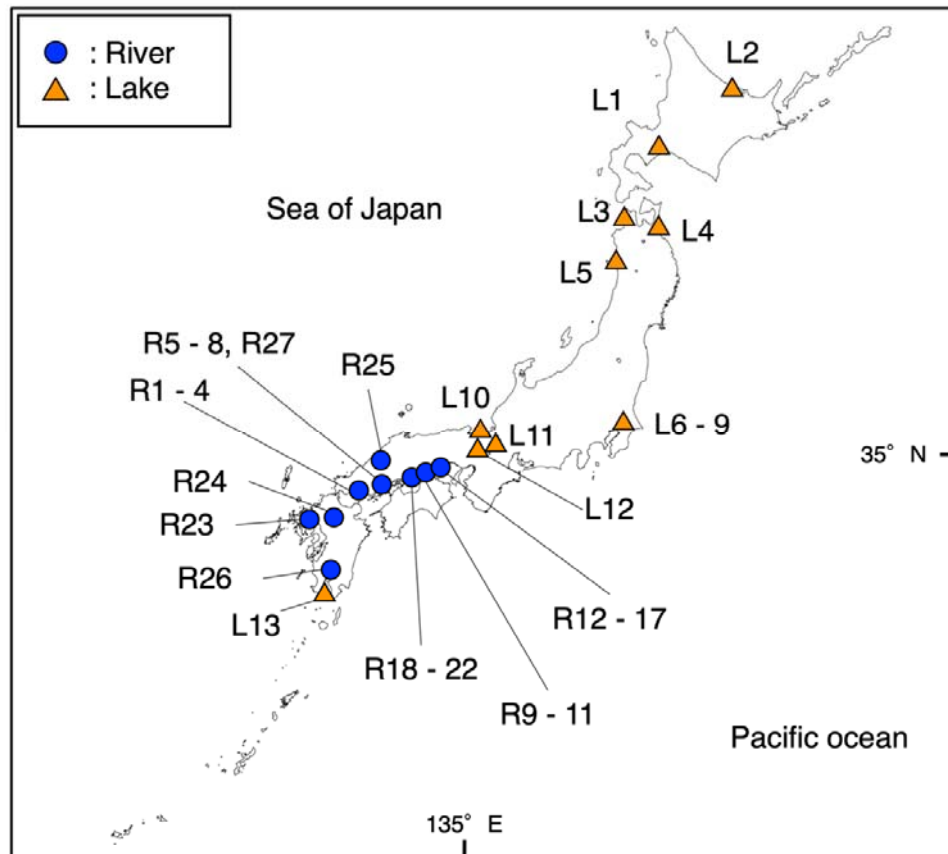

564 Figure 1. Sampling sites used in the present study. Blue circles and orange triangles show the  
565 locations of the river and lake samples, respectively. Detailed information on each site is  
566 listed in Supplementary Table S1.

567

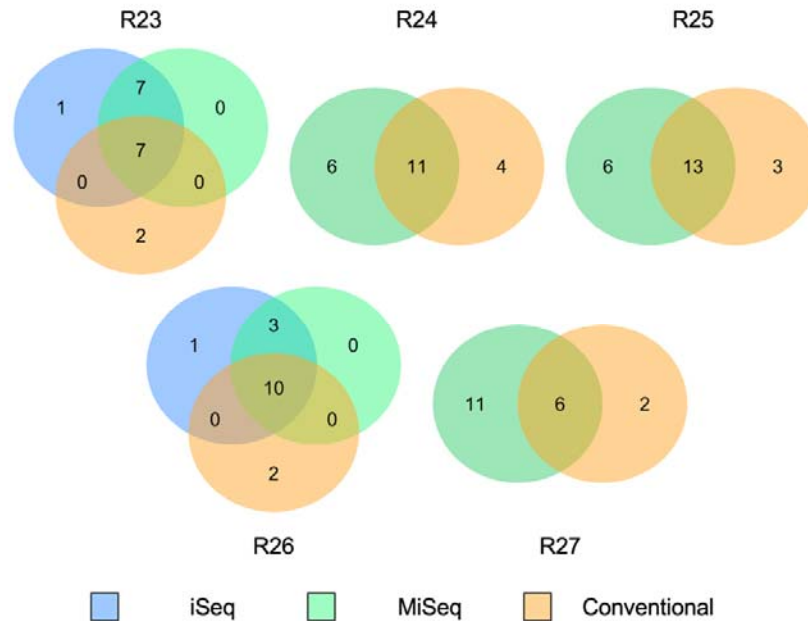

568

569 Figure 2. Venn diagrams for comparison of the number of species between high throughput  
570 sequencers and conventional methods in 5 river samples (R23-27 in Fig. 1). Blue, green, and  
571 orange circles indicate the species of eDNA of iSeq, eDNA of MiSeq, and conventional  
572 methods, respectively. Deep green circles in R24, 25, and 27 indicate the species of two  
573 sequencers because of fully-overlapping species composition between iSeq and MiSeq. Note  
574 that the size of each circle does not represent a difference in the number of species.

575

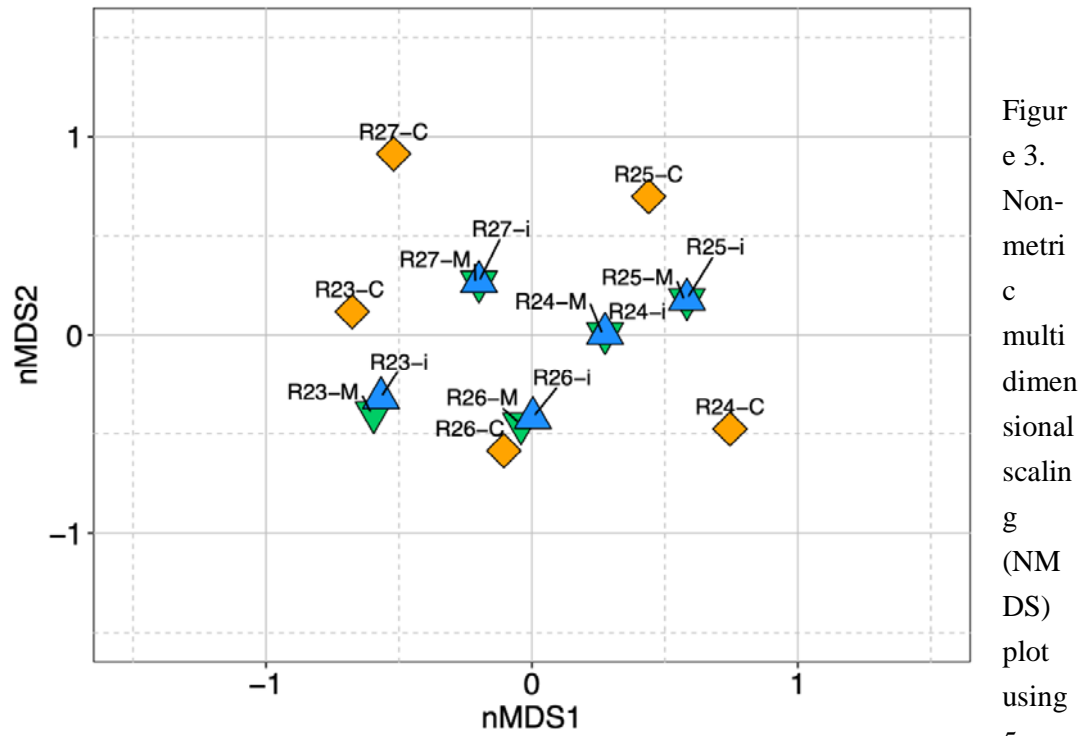

592 river samples. Blue triangles, green inverted triangles, and diamond shapes indicate the points  
593 of iSeq, MiSeq, and conventional methods, respectively. Labels with these shapes also  
594 indicate iSeq (-i), MiSeq (-M), and conventional methods (-C).

595

596

597

598

599

Table 1 Ratio of sequence reads and Operational Taxonomic Unit (OTU) count after denoising

|                           | iSeq    |        | MiSeq   |        |
|---------------------------|---------|--------|---------|--------|
| <b>Read Ratio</b>         |         |        |         |        |
| Denoised Read             | 3010341 | 100.0% | 1914412 | 100.0% |
| Assigned Read             | 2732599 | 90.8%  | 1687629 | 88.2%  |
| <b>OTU Ratio</b>          |         |        |         |        |
| Total OTUs                | 154     | 100.0% | 168     | 100.0% |
| OTU(Freshwater)           | 102     | 66.2%  | 101     | 60.1%  |
| OTU (Marine and Brackish) | 24      | 15.6%  | 22      | 13.1%  |
| Under 99 % Identity       | 28      | 18.2%  | 45      | 26.8%  |

Table 2 Statistical results of Permutational Multivariate Analysis of Variance (PERMANOVA) and Permutational Multivariate Analysis of Dispersion (PERMDISP) for comparisons of species composition between iSeq and MiSeq

|           | Df† | Sum of Square | Mean Square | F value | R <sup>2</sup> | Pr (>F) |
|-----------|-----|---------------|-------------|---------|----------------|---------|
| PERMANOVA |     |               |             |         |                |         |
| Methods‡  | 2   | 0.35707       | 0.17853     | 0.96117 | 0.13808        | 0.48450 |
| Residuals | 12  | 2.22894       | 0.18574     |         | 0.86192        |         |
| Total     | 14  | 2.58600       |             |         | 1.00000        |         |
| PERMDISP  |     |               |             |         |                |         |
| Methods‡  | 2   | 0.01696       | 0.00848     | 1.94810 |                | 0.18510 |
| Residuals | 12  | 0.05224       | 0.00435     |         |                |         |

† Degree of Freedom (Df)

‡ Species detection methods (iSeq, MiSeq, and Conventional)
